# Supplementary material for: INA complex liaises the F1Fo-ATP synthase membrane motor modules
Source: PubMed Central journal article supplement (PMC5665977; doi:10.1038/s41467-017-01437-z), 2017-11-01
Supplement: 41467_2017_1437_MOESM1_ESM.pdf [file 41467_2017_1437_MOESM1_ESM.pdf]

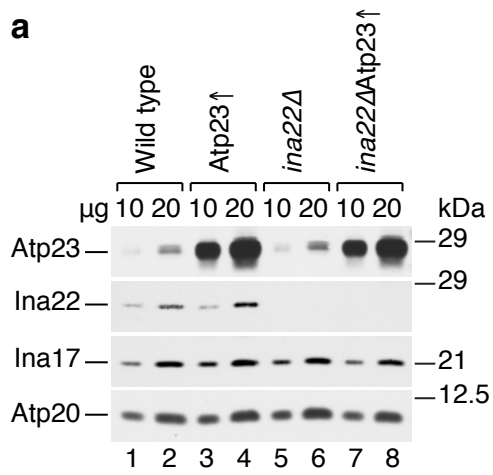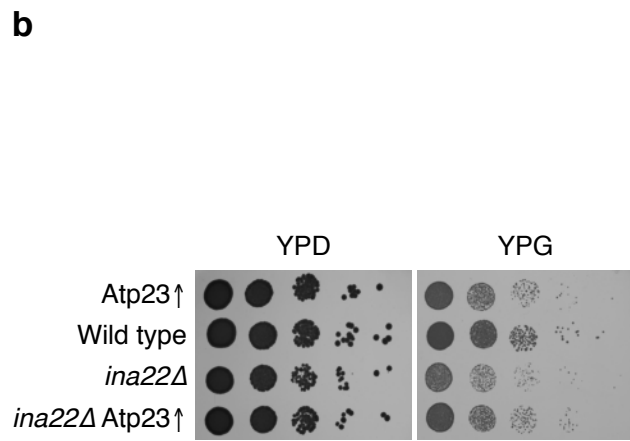

**Supplementary Figure 1. Related to Figure 2**

**a** Steady-state protein levels in wild type and mutant mitochondria were analyzed by SDS-PAGE and Western blotting with indicated antibodies.

**b** Serial dilution of wild type and mutant yeast cells was spotted on YPD or YPG plates. The plates were grown at 37°C for 2-5 days.

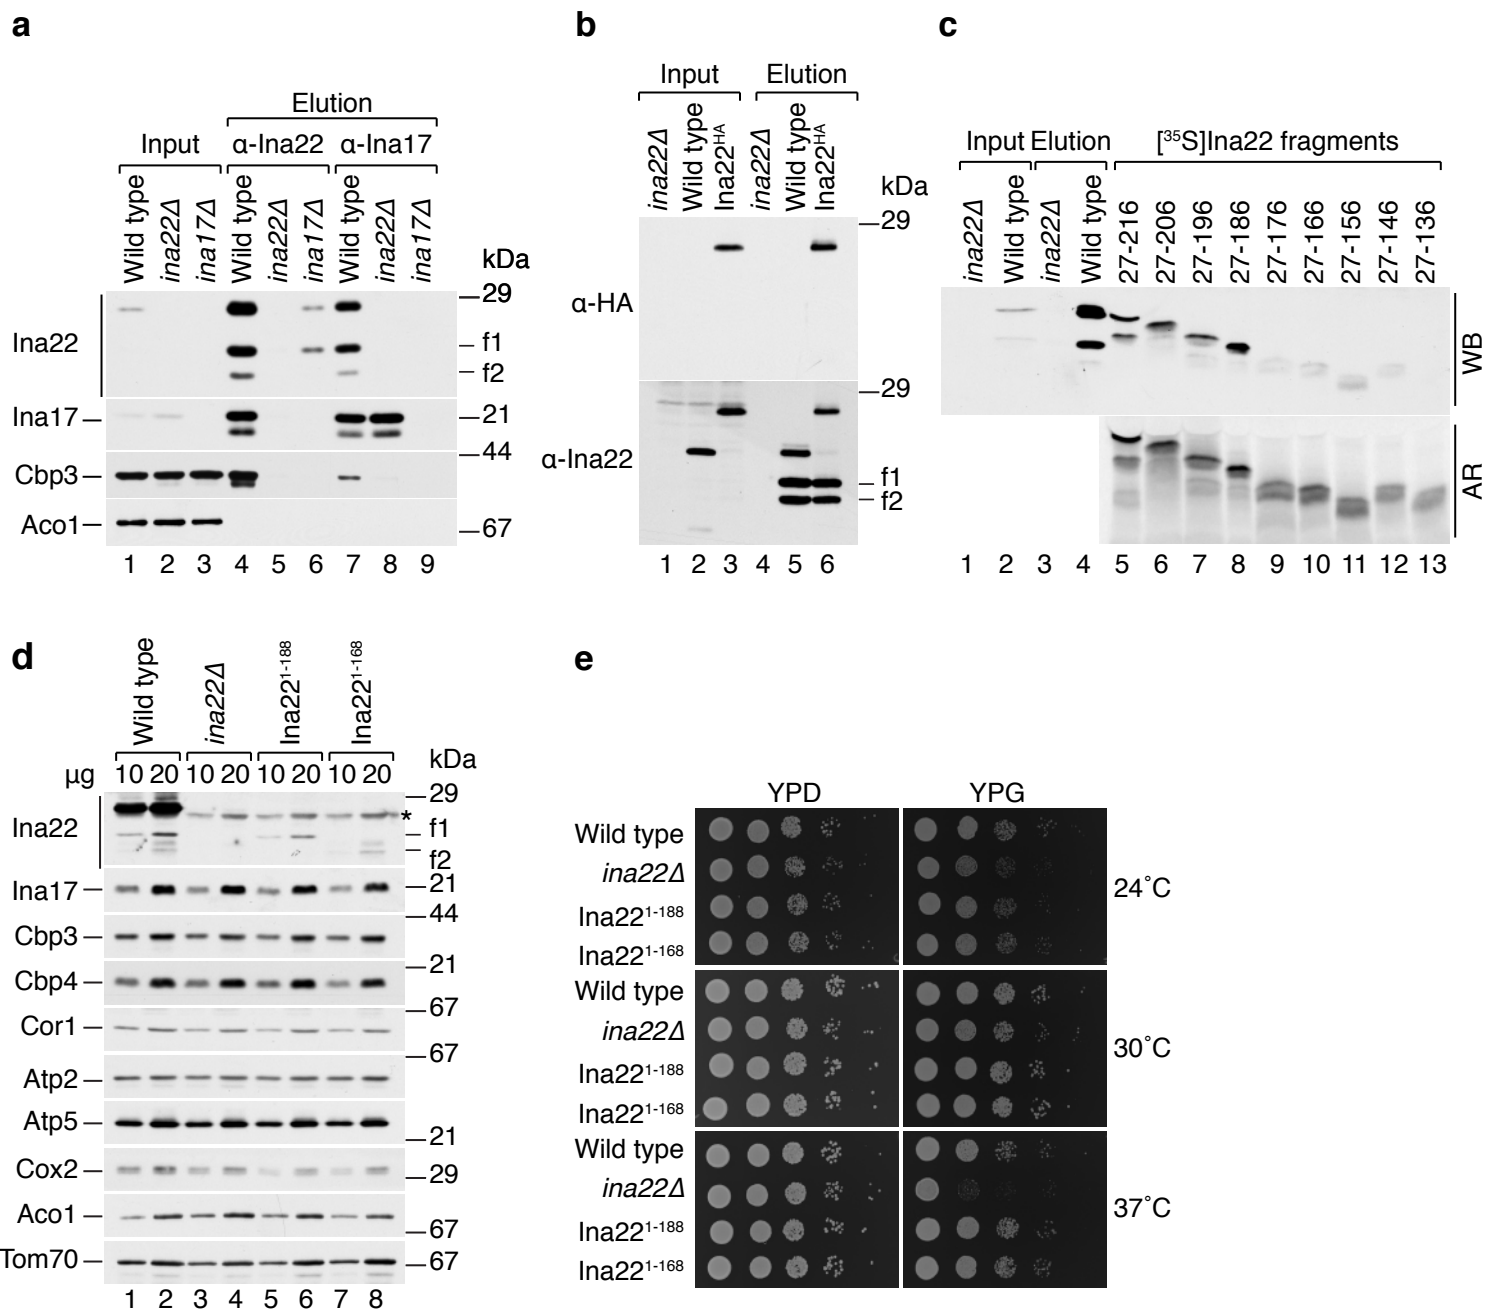

**Supplementary Figure 2. Related to Figure 3**

**a** Wild type, *ina22Δ* and *ina17Δ* mitochondria were solubilized and protein complexes were co-immunoprecipitated with anti-Ina22 and anti-Ina17 antibodies. Input and elution fractions were analyzed by SDS-PAGE and Western blotting with indicated antibodies. Input = 1% of elution. f1, f2 – Ina22 fragments.

**b** *ina22Δ*, wild type and *Ina22<sup>HA</sup>* mitochondria were subjected to co-immunoprecipitation with anti-Ina22 antibodies. Input and elution fractions were analyzed by SDS-PAGE and Western blotting with either anti-HA or anti-Ina22 antibodies. Input = 1% of elution. f1, f2 – Ina22 fragments.

**c** Ina22 was immunoprecipitated from wild type and *ina22Δ* mitochondria with anti-Ina22 antibodies and the molecular weight of its fragments was assessed by comparing their electrophoretic mobility (lanes 1-4) to the mobility of in vitro generated radio-labeled Ina22 fragments (lanes 5-13). Samples were analyzed by SDS-PAGE, digital autoradiography (AR) and Western blotting (WB).

**d** Mitochondrial proteins in wild type and mutant mitochondria were analyzed by SDS-PAGE and Western blotting with the indicated antibodies. The asterisk (\*) indicates a cross-reacting band. f1, f2 – Ina22 fragments.

**e** Serial dilutions of yeast cells were spotted on YPD or YPG plates. The plates were grown at the indicated temperatures for 2-5 days.

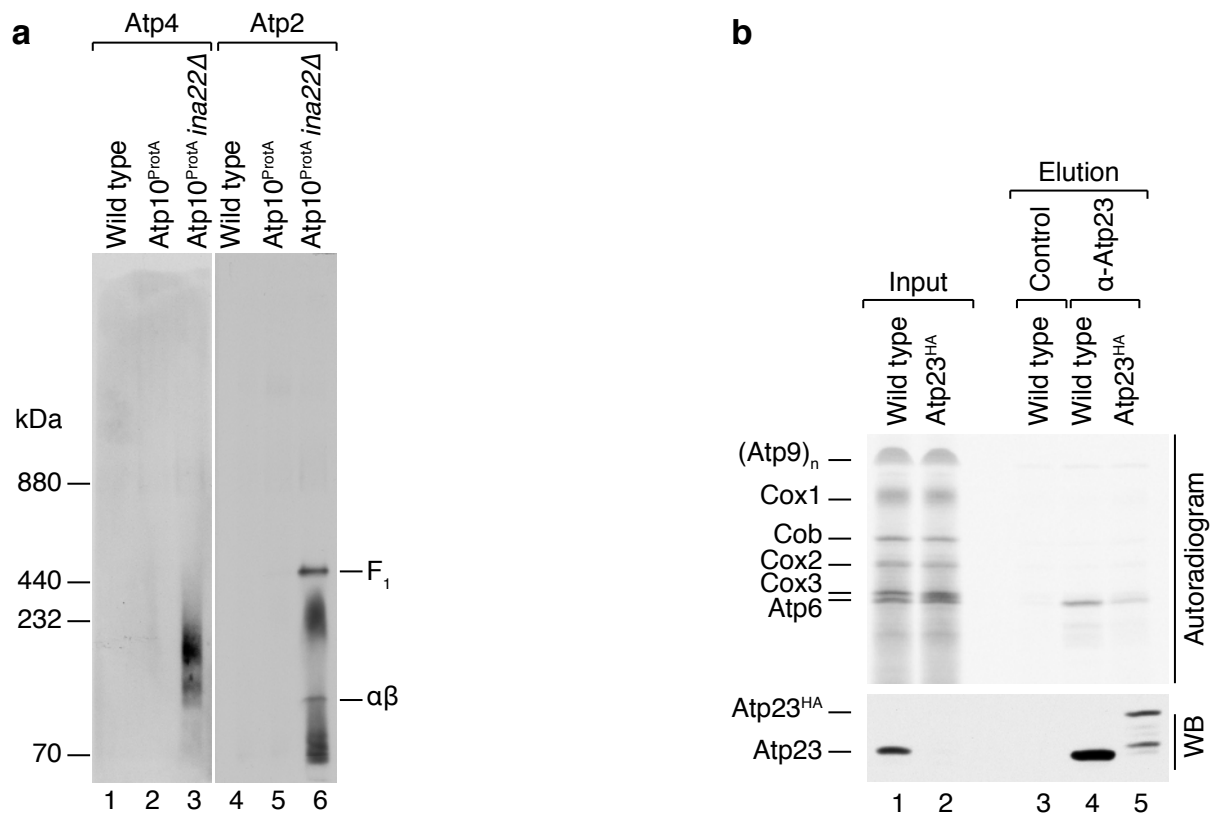

**Supplementary Figure 3. Related to Figure 4**

**a** Wild type, Atp10<sup>ProtA</sup> and Atp10<sup>ProtA</sup> ina22Δ mitochondria were solubilized and subjected to IgG affinity chromatography. Purified complexes were eluted via TEV-protease cleavage and analyzed by BN-PAGE and Western blotting with indicated antibodies. αβ – dimer containing Atp1 and Atp2.

**b** Wild type and Atp23<sup>HA</sup> mitochondria were subjected to in organello labeling for 20 minutes and immunoprecipitation with control or anti-Atp23 antibodies. Input and elution fractions were analyzed by Urea SDS-PAGE, Western blotting (WB) and autoradiography. Input = 2% of elution

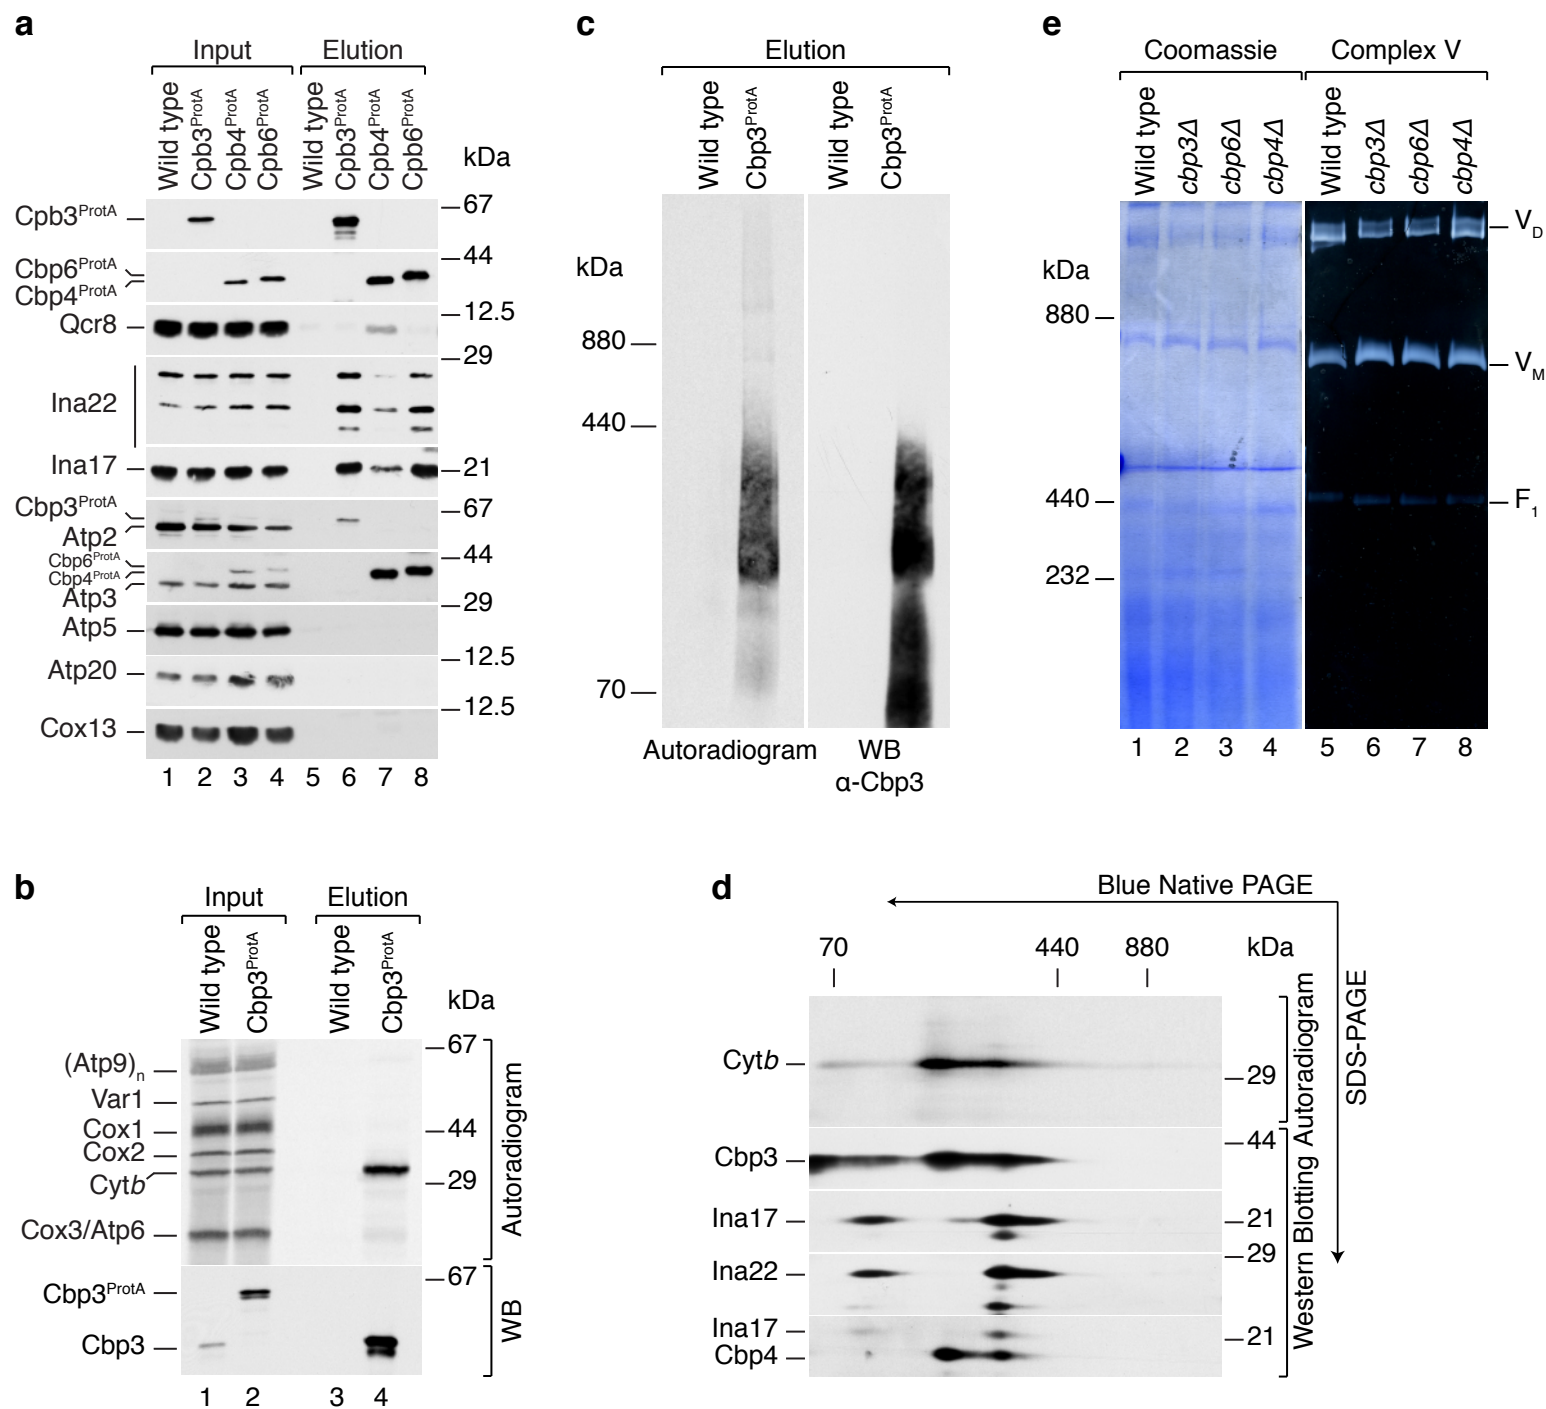

**Supplementary Figure 4. Related to Figure 6**

**The INA complex associates with cytochrome *b* biogenesis factors**

**a** Protein complexes were isolated via IgG affinity chromatography from Cbp3<sup>ProtA</sup>, Cbp4<sup>ProtA</sup>, Cbp6<sup>ProtA</sup> and control wild type mitochondria and analyzed by SDS-PAGE and Western blotting with indicated antibodies. Input = 1% of elution.

**b** Mitochondrial-encoded proteins were radiolabeled in organello and protein complexes were isolated from Cbp3<sup>ProtA</sup> and wild type mitochondria via IgG affinity chromatography and TEV-cleavage. Input and elution fractions were analyzed by SDS-PAGE, Western blotting (WB) with anti-Cbp3 antibodies, or autoradiography. Input = 1% of elution.

**c** Part of the elution fractions of the experiment presented in Supplementary Figure 4b was analyzed by BN-PAGE, followed by either Western blotting (WB) with anti-Cbp3 antibodies (right panel) or autoradiography (left panel).

**d** Part of the Cbp3<sup>ProtA</sup> elution of the experiment presented in Supplementary Figure 4b was analyzed by BN-PAGE, followed by second dimension SDS-PAGE, autoradiography (upper panel) or Western blotting with the indicated antibodies.

**e** *cbp3Δ*, *cbp4Δ*, *cbp6Δ* and control wild type mitochondria were solubilized and analyzed by BN-PAGE followed by either gel

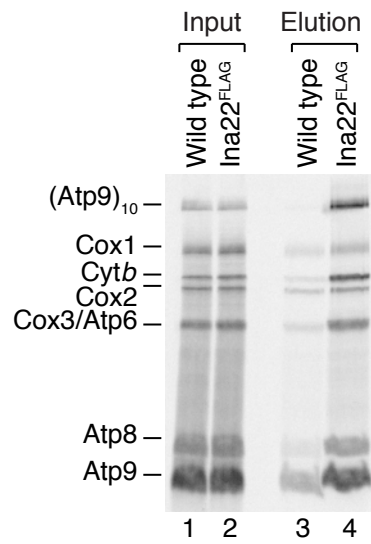

**Supplementary Figure 5. Related to Figure 6**

Chloramphenicol-pretreated wild type and *Ina22<sup>FLAG</sup>* mitochondria were subjected to in organello labeling for 20 min, anti-FLAG affinity chromatography and further analysis as described in Figure 6a. Input = 1% of elution.

Supplementary Figure 6.

Original scans of key Western blots and gels presented in the paper

Figure 1d

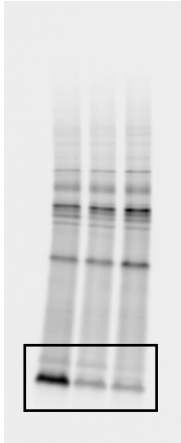

Figure 2d

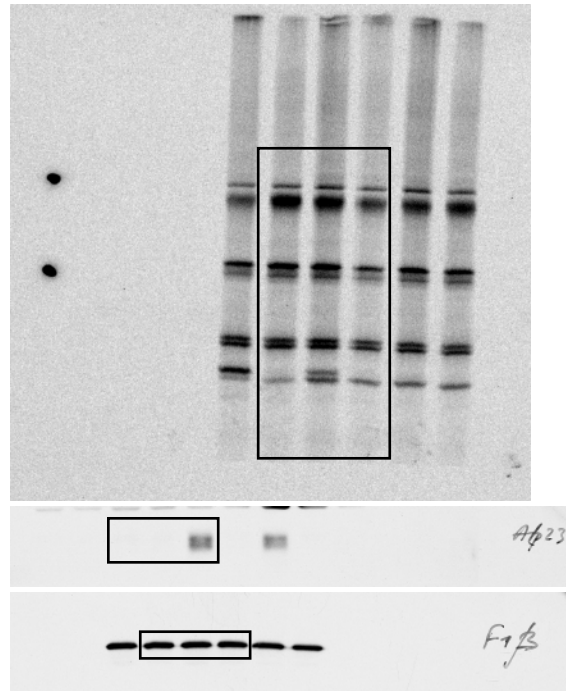

Figure 2a

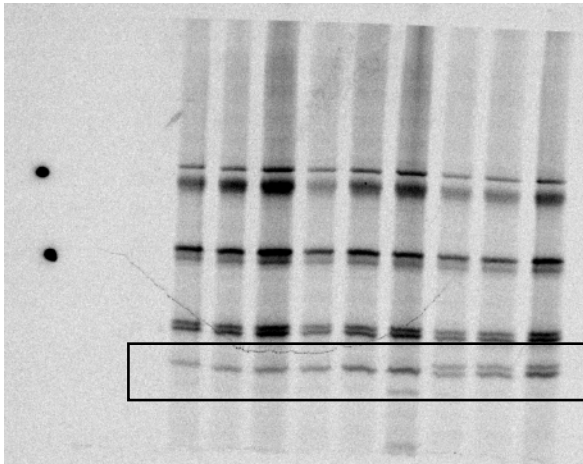

Figure 3a

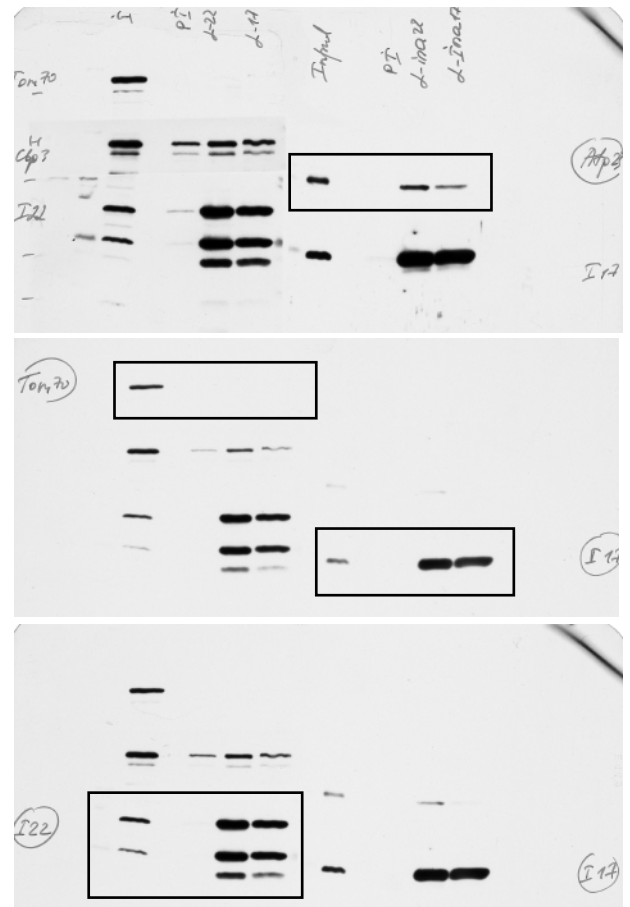

Figure 2b

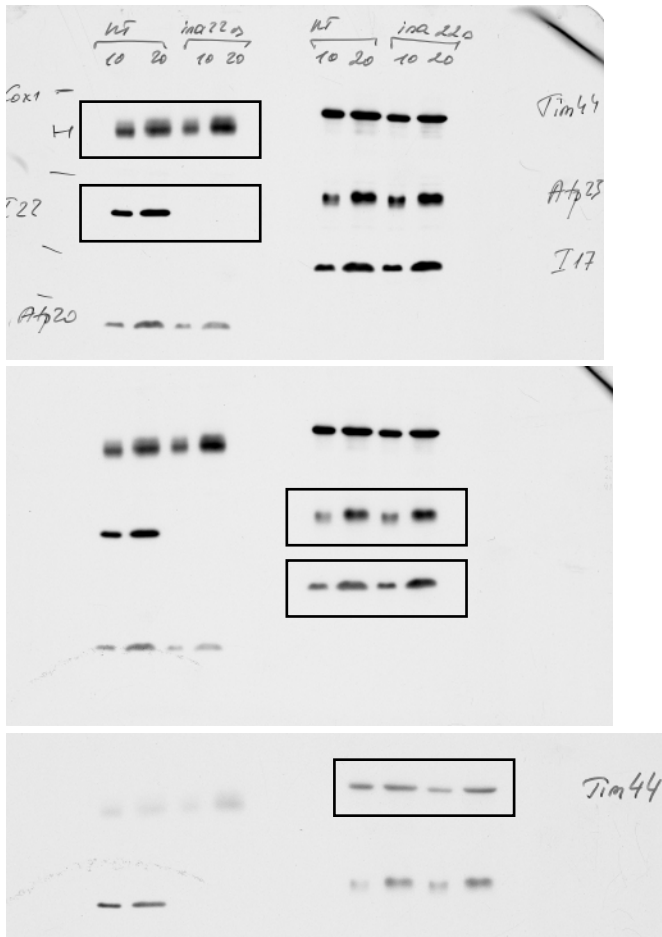

Supplementary Figure 7.

Original scans of key Western blots and gels presented in the paper

Figure 3b

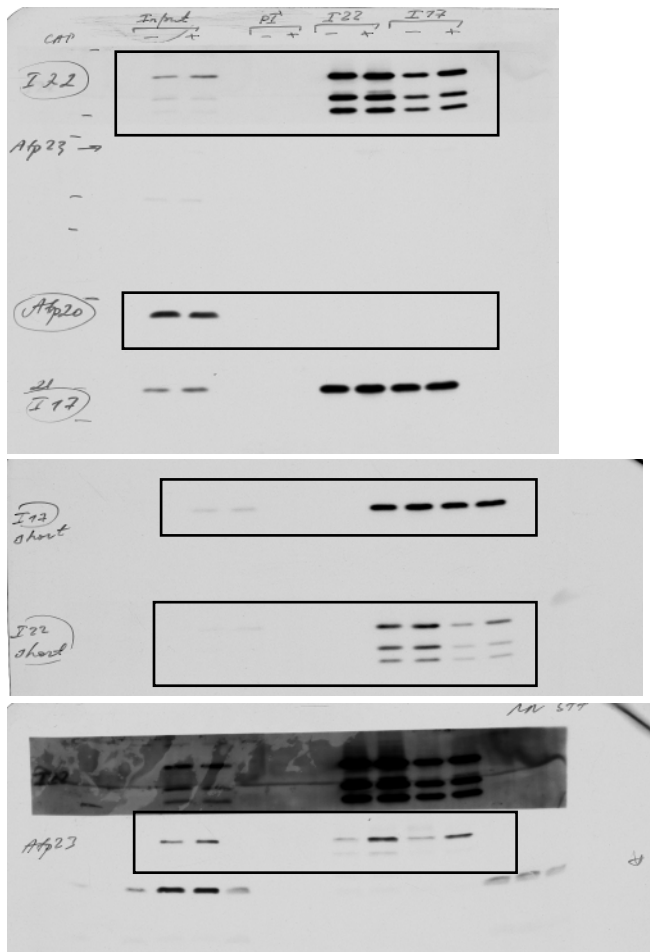

Figure 3e

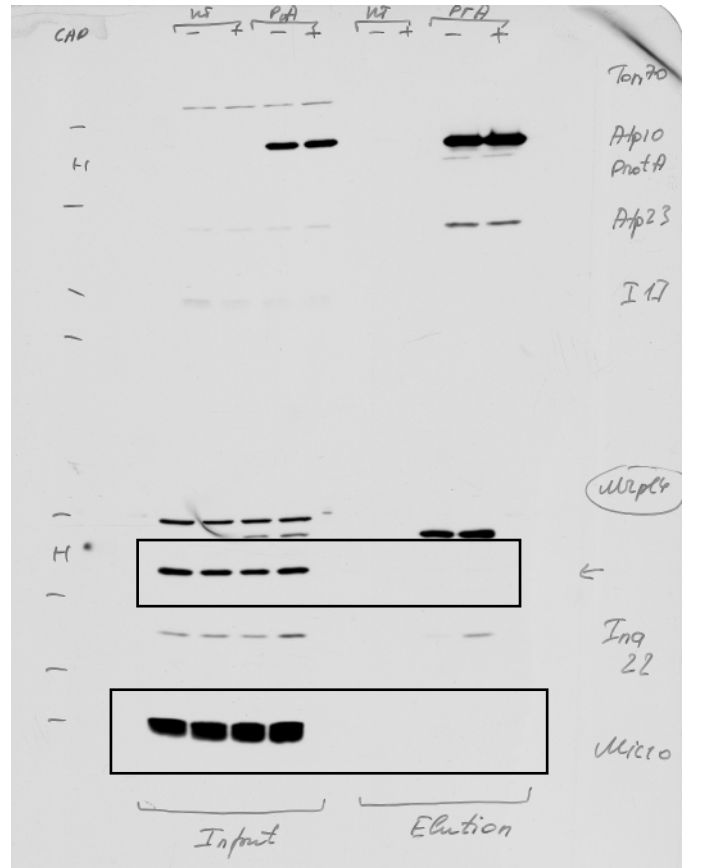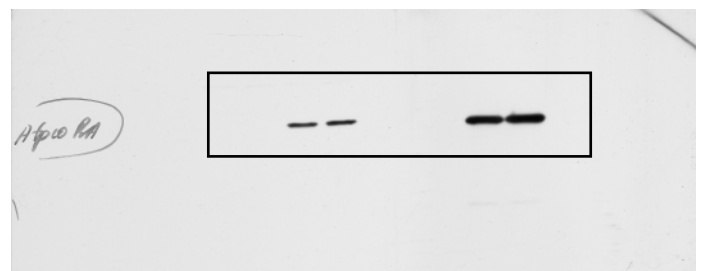

Figure 3e

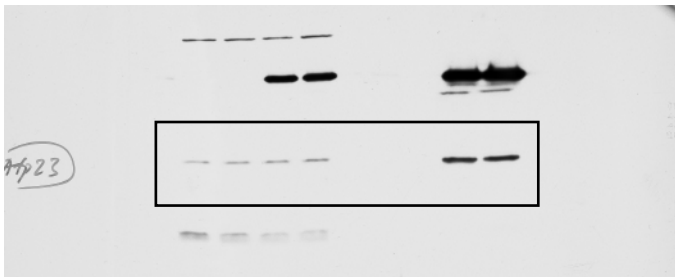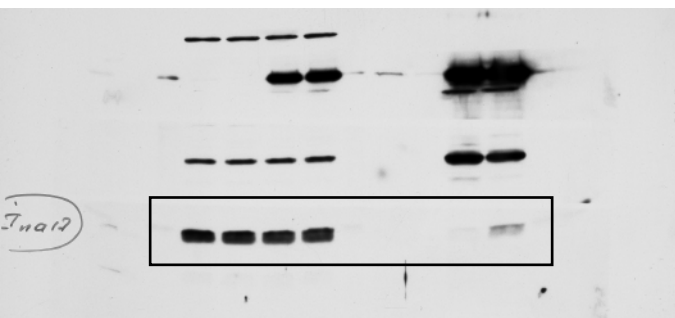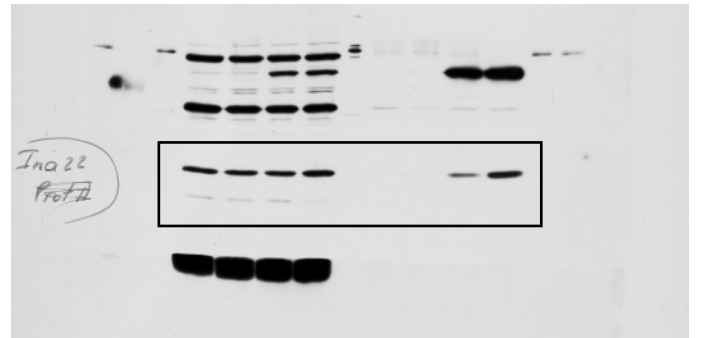



Supplementary Figure 8.

Original scans of key Western blots and gels presented in the paper

Figure 3f

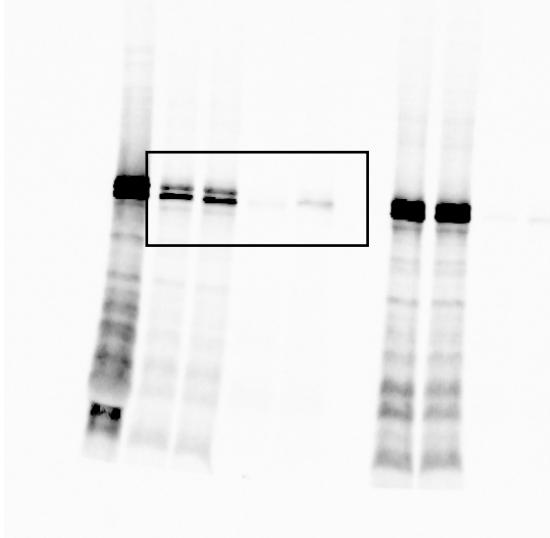

Figure 3g

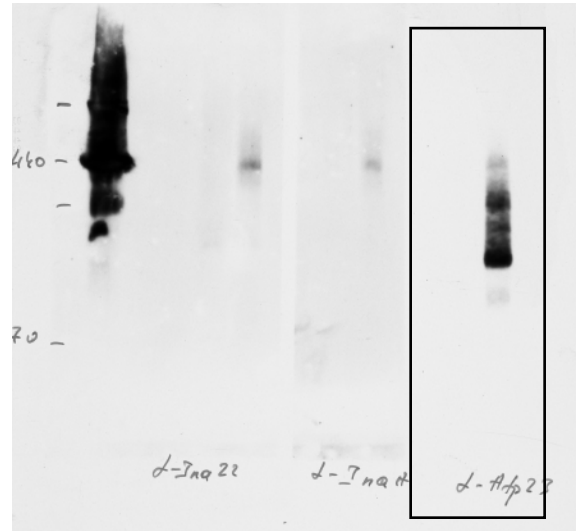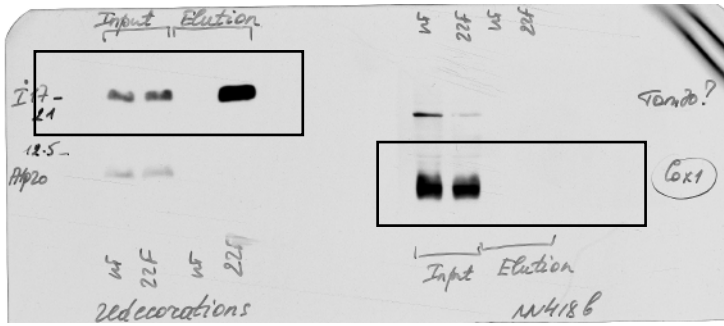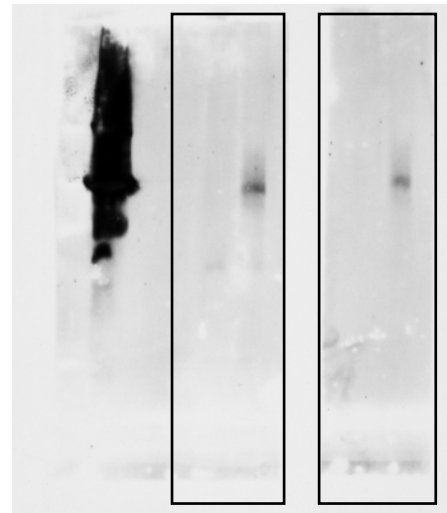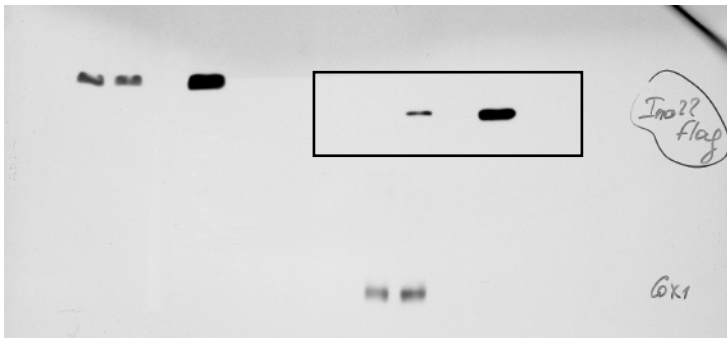

Figure 4a

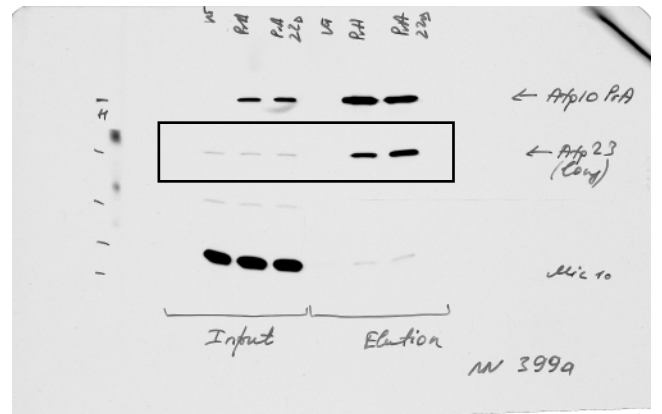

Figure 4a

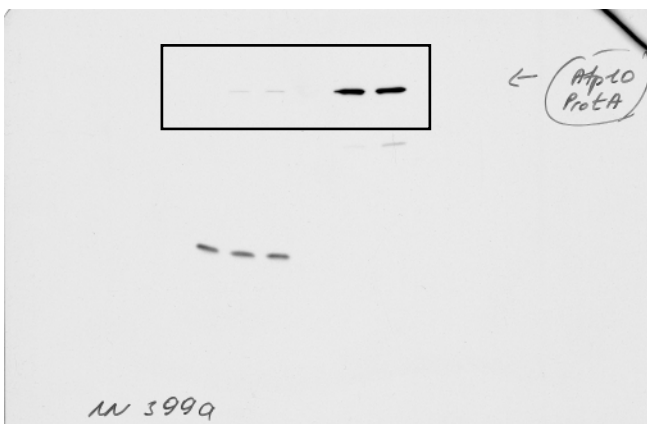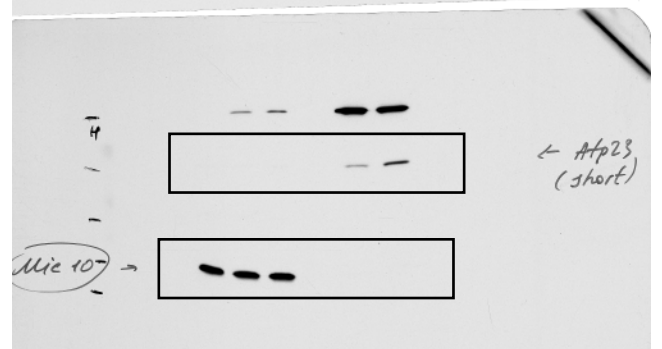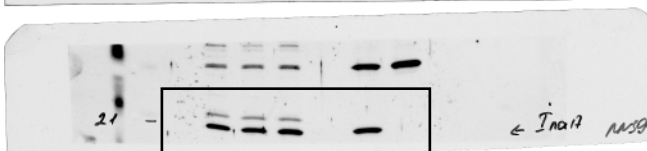



Supplementary Figure 9.

Original scans of key Western blots and gels presented in the paper

Figure 4c

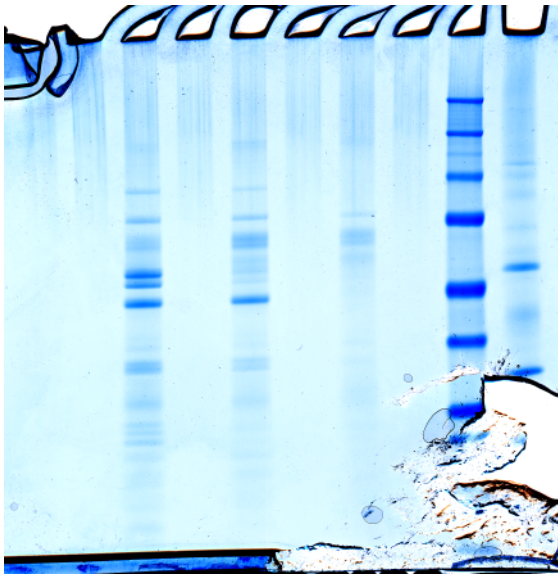

Figure 4e

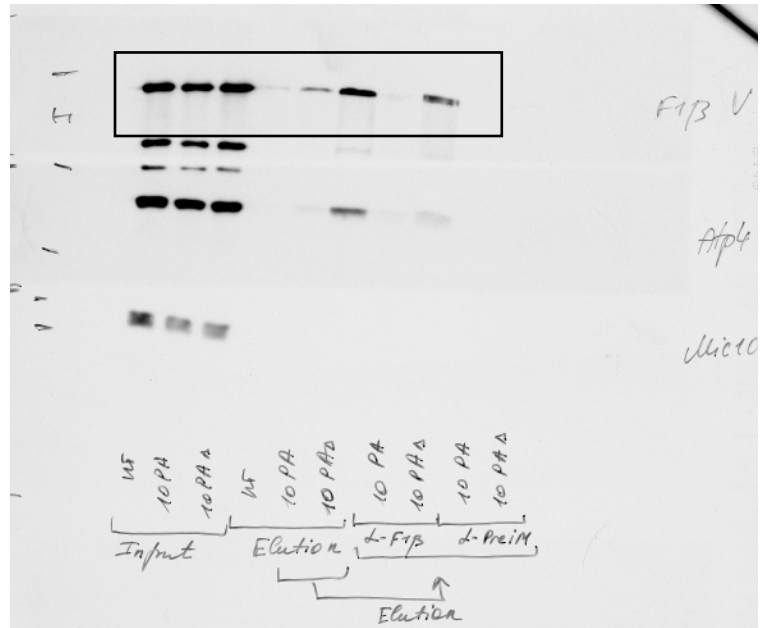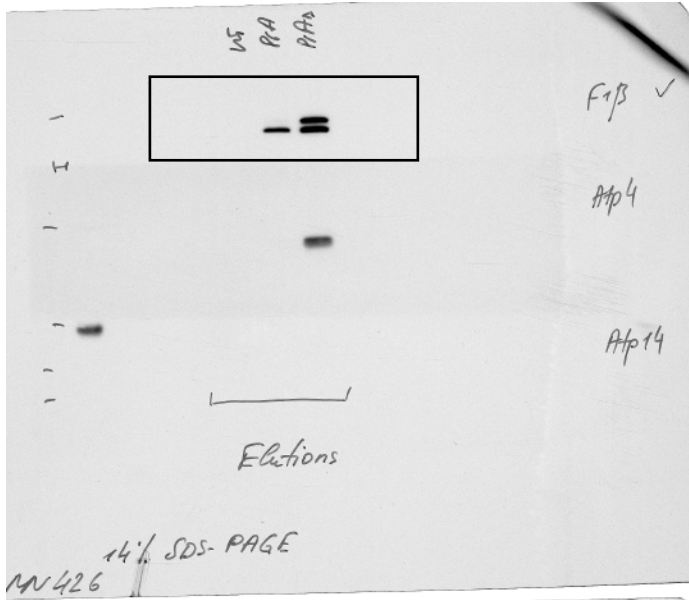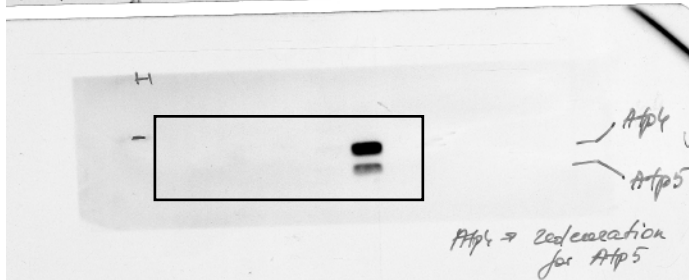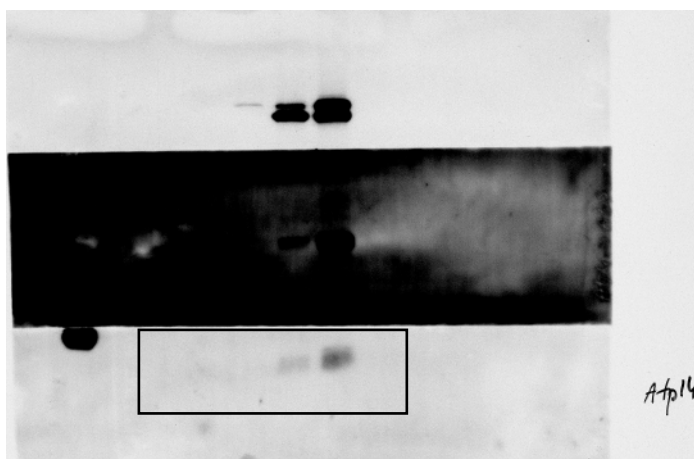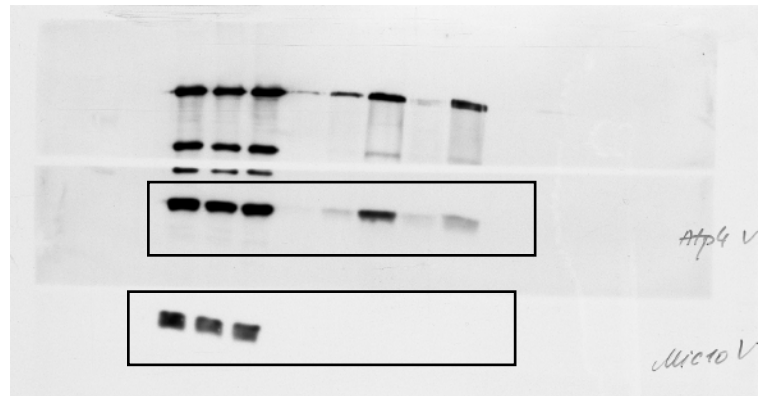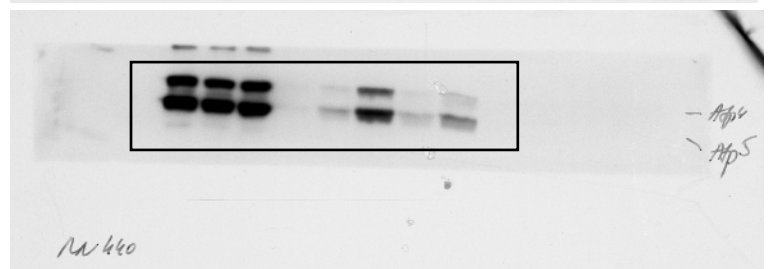

Supplementary Figure 10.

Original scans of key Western blots and gels presented in the paper

Figure 4f

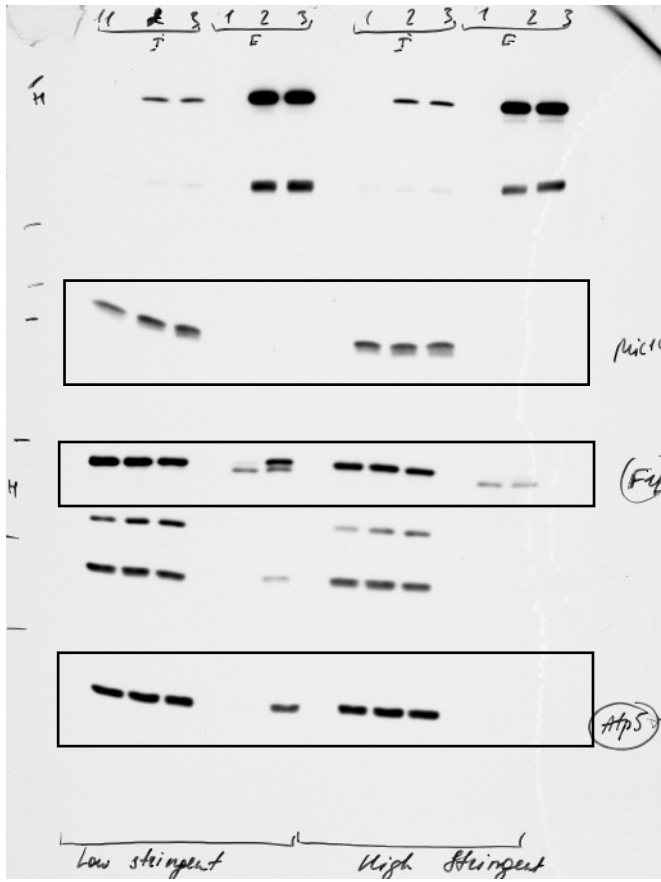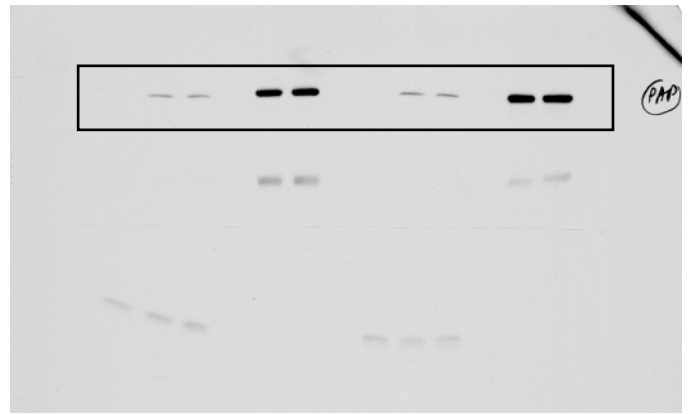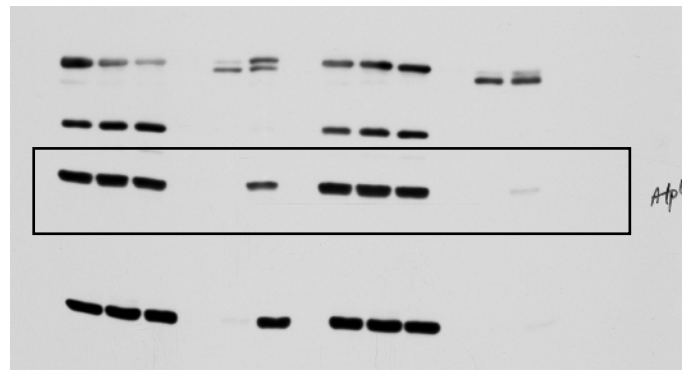

Figure 5a

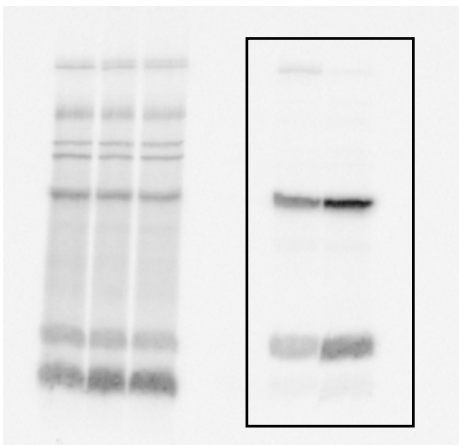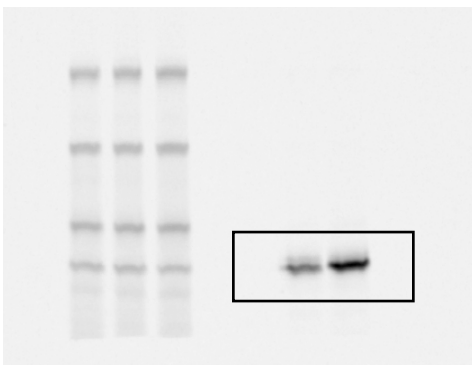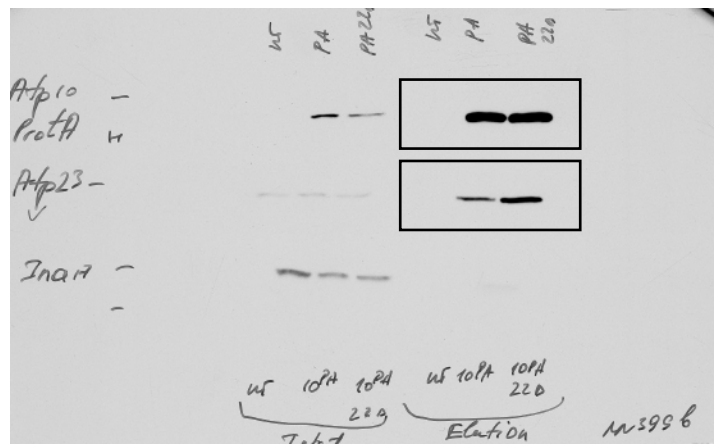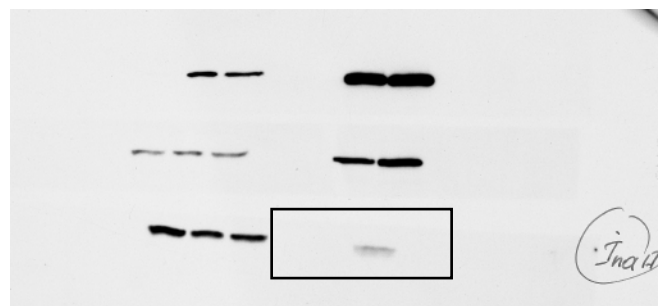

Supplementary Figure 11.

Original scans of key Western blots and gels presented in the paper

Figure 5b

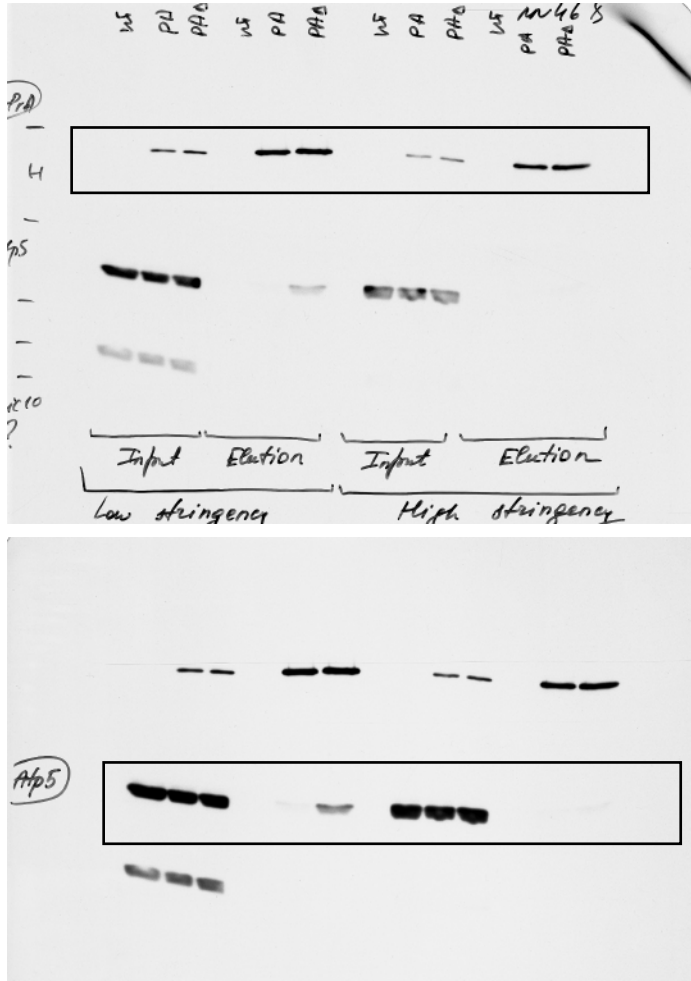

Figure 5c

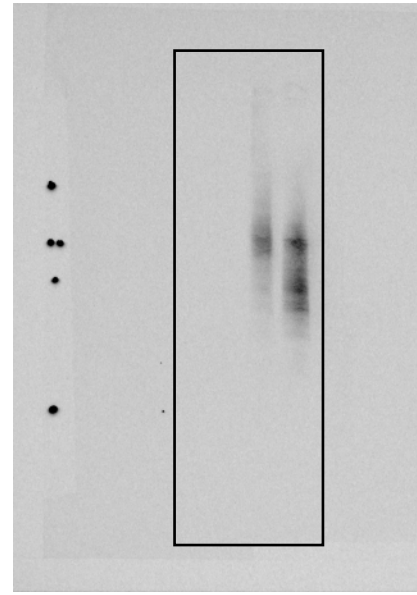

Figure 5g

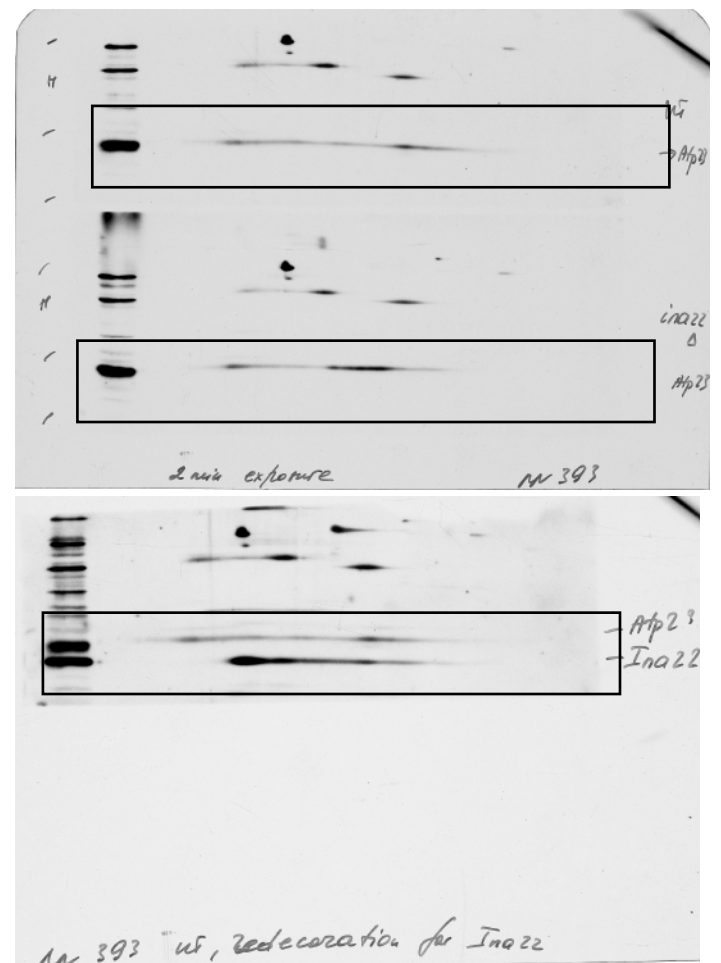

Figure 6a

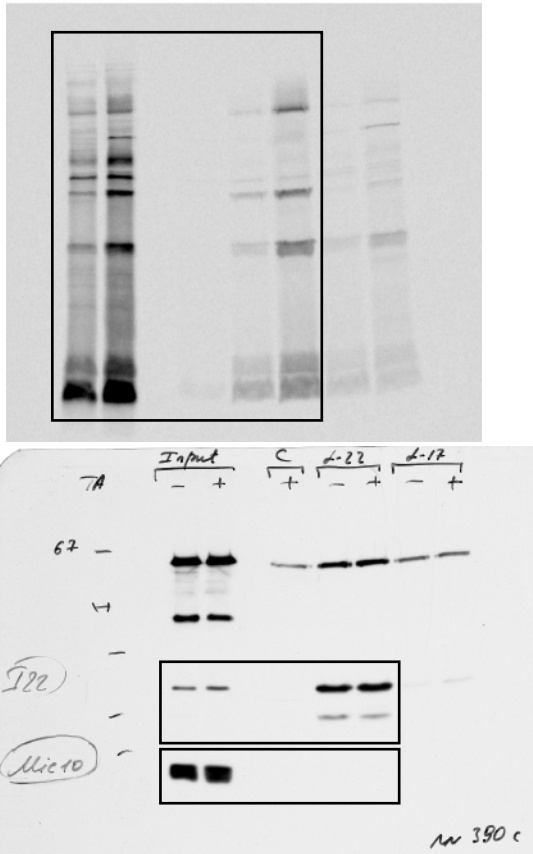

Supplementary Figure 12.

Original scans of key Western blots and gels presented in the paper

Figure 6c

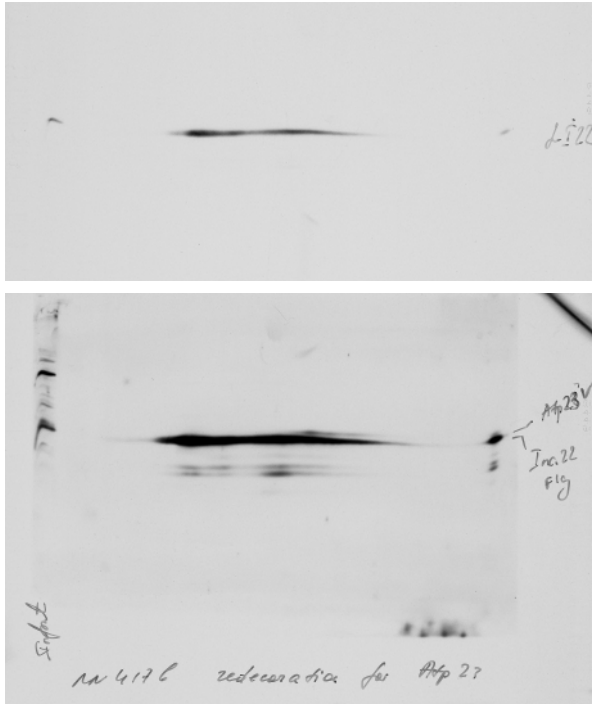

Supplementary Figure 1a

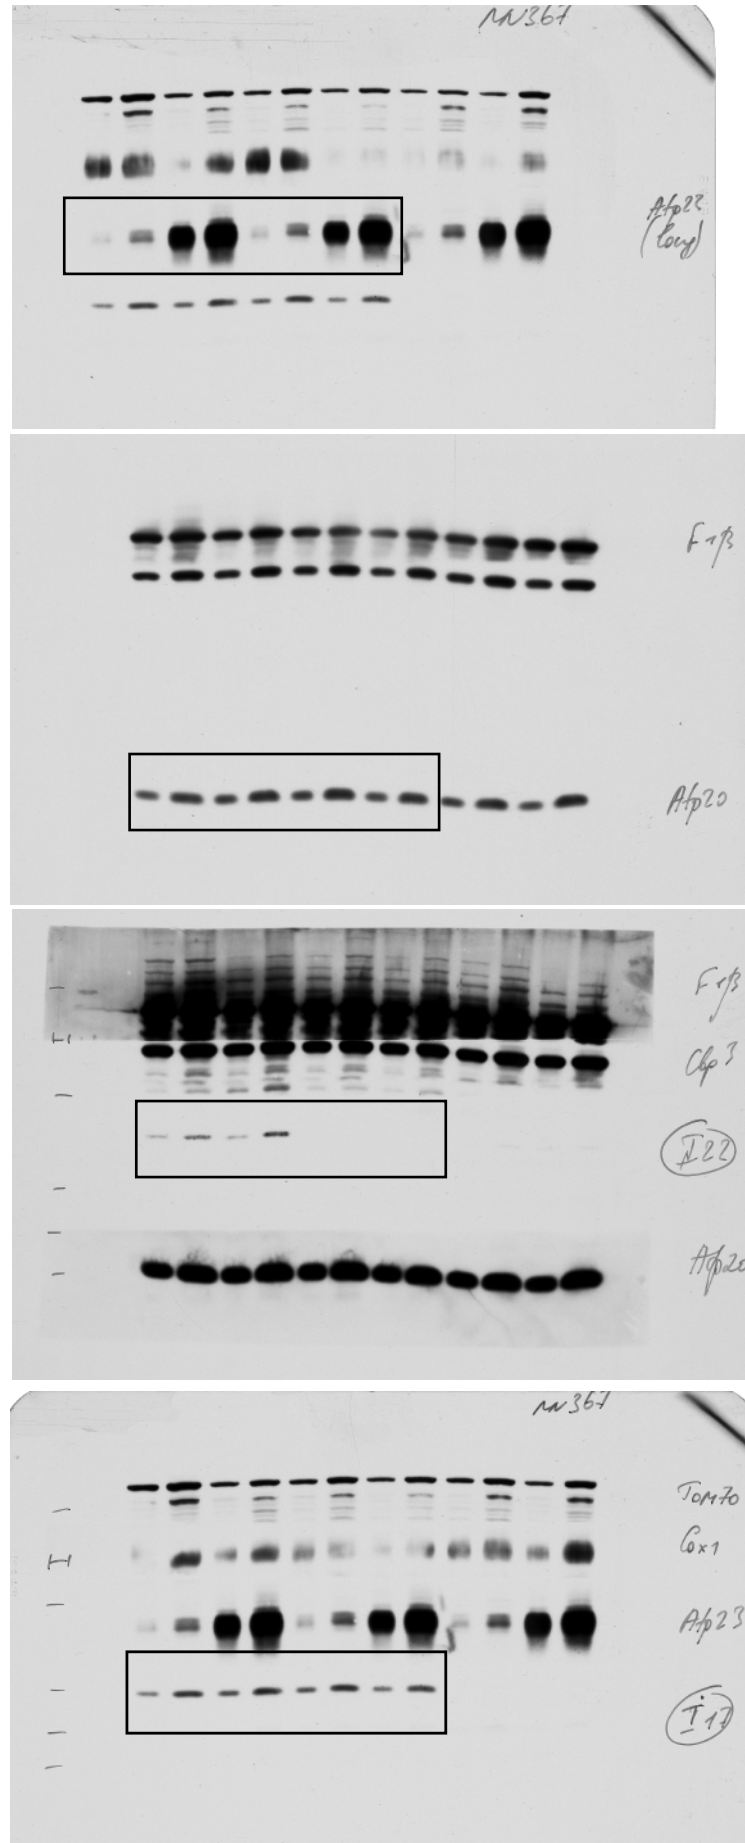

Supplementary Figure 2a

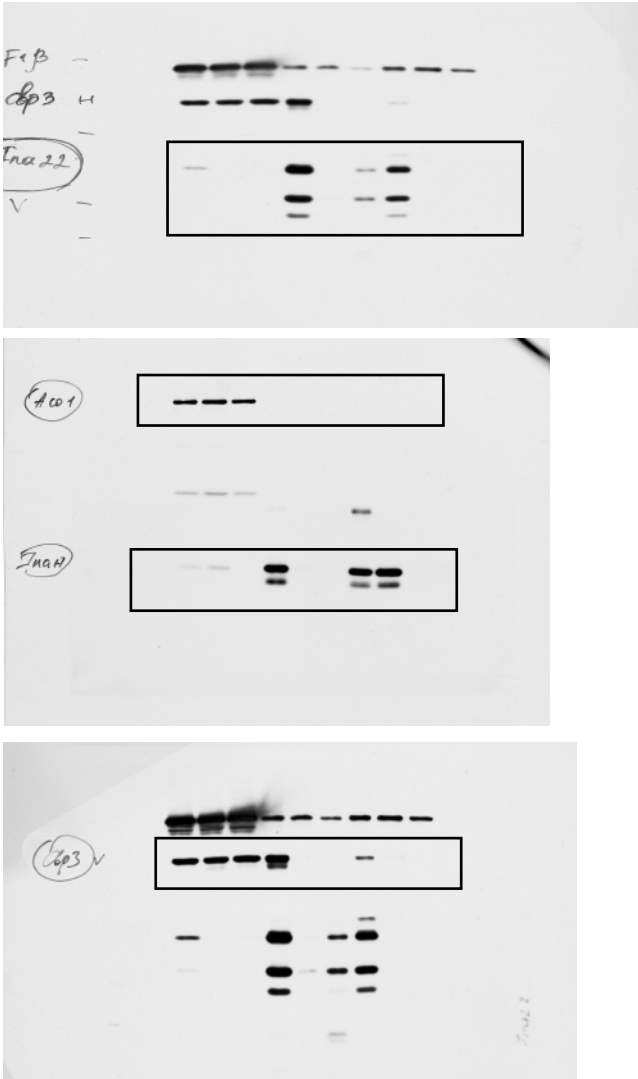



Supplementary Figure 13.

Original scans of key Western blots and gels presented in the paper

Supplementary Figure 2c

Supplementary Figure 2b

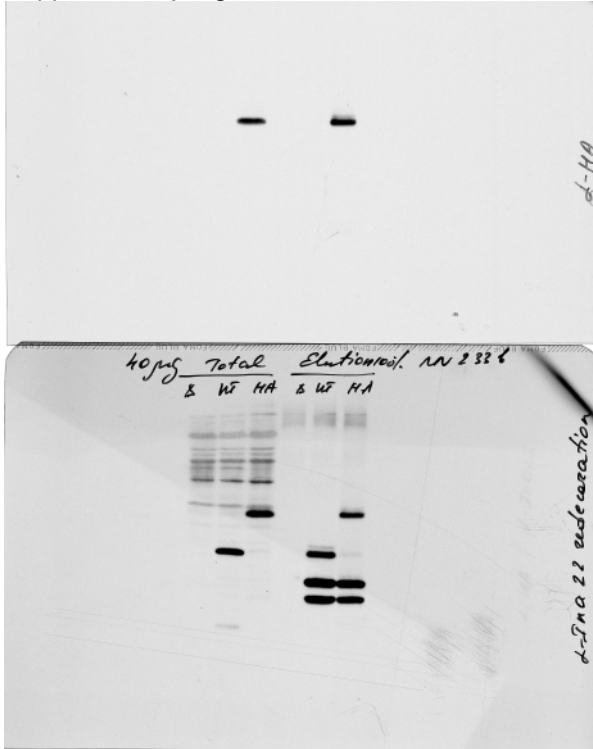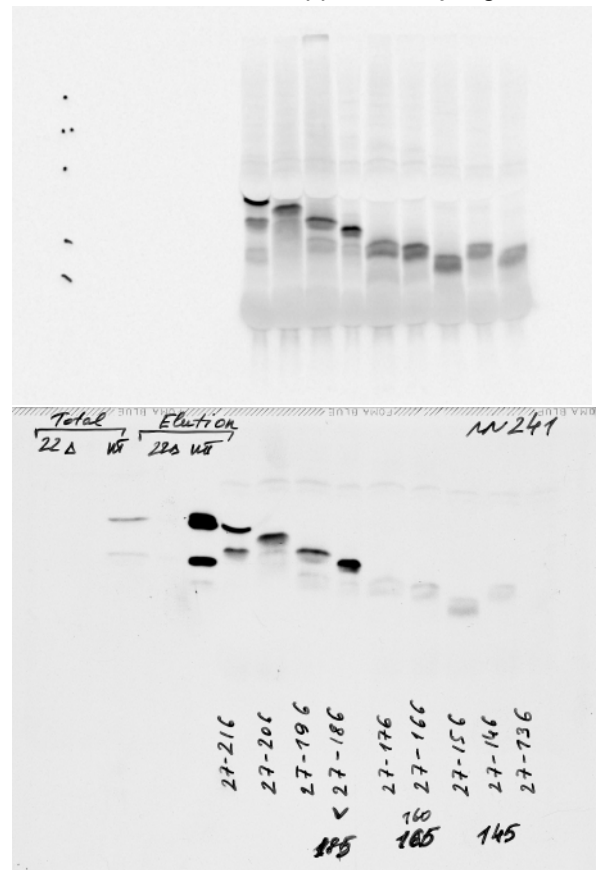

Supplementary Figure 2d

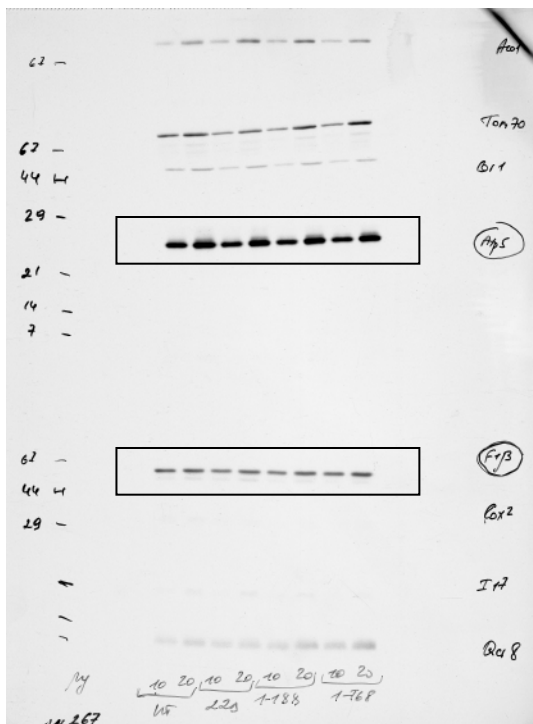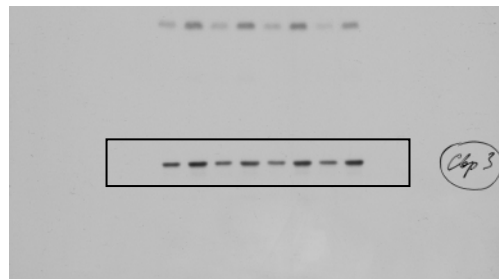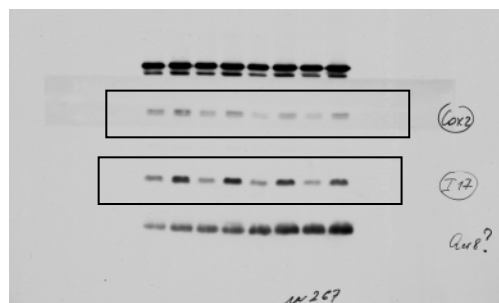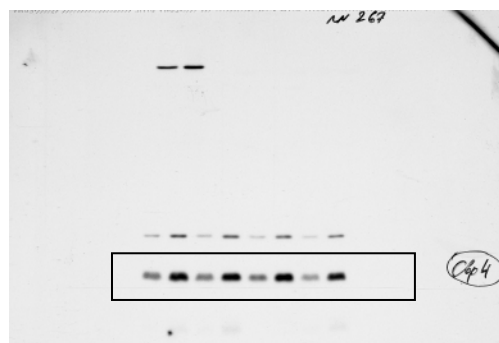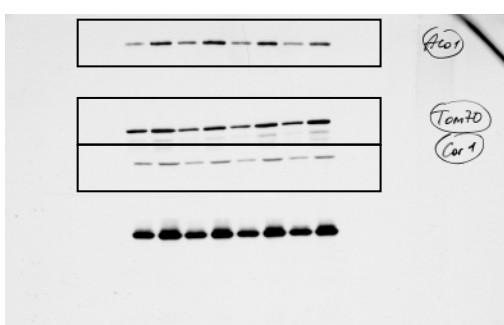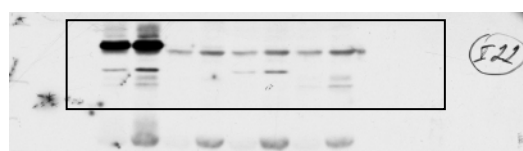

Supplementary Figure 14.

Original scans of key Western blots and gels presented in the paper

Supplementary Figure 3b

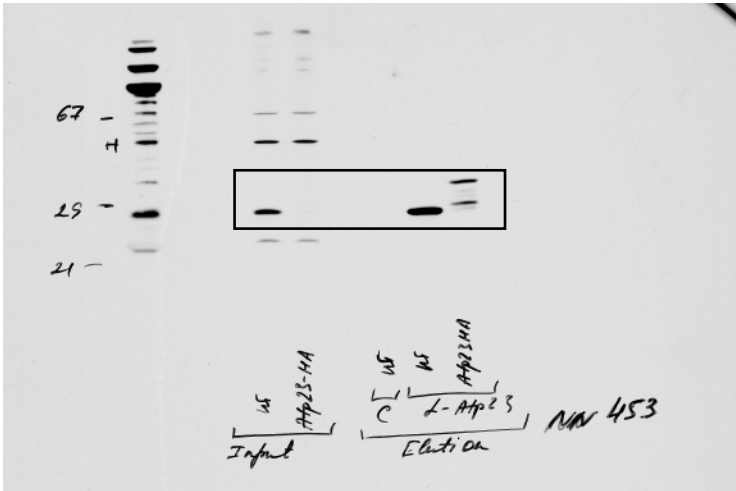

Supplementary Figure 4a

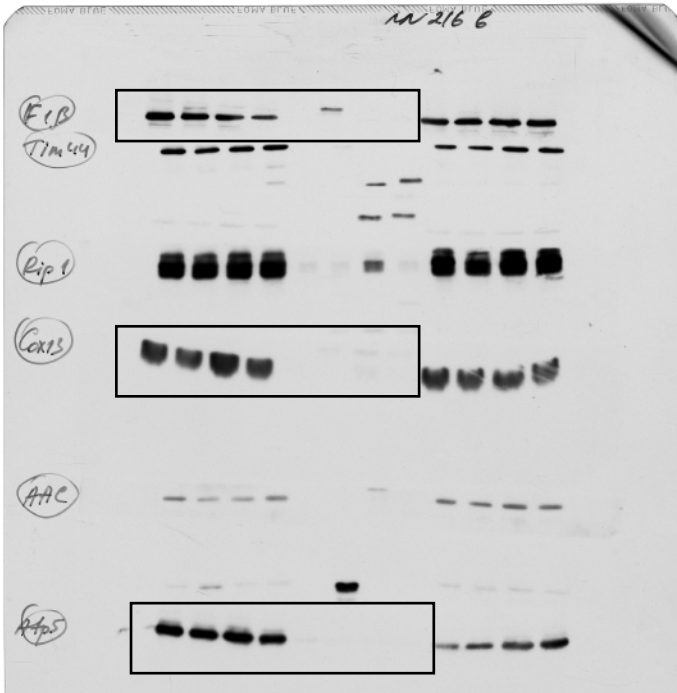

Supplementary Figure 4a

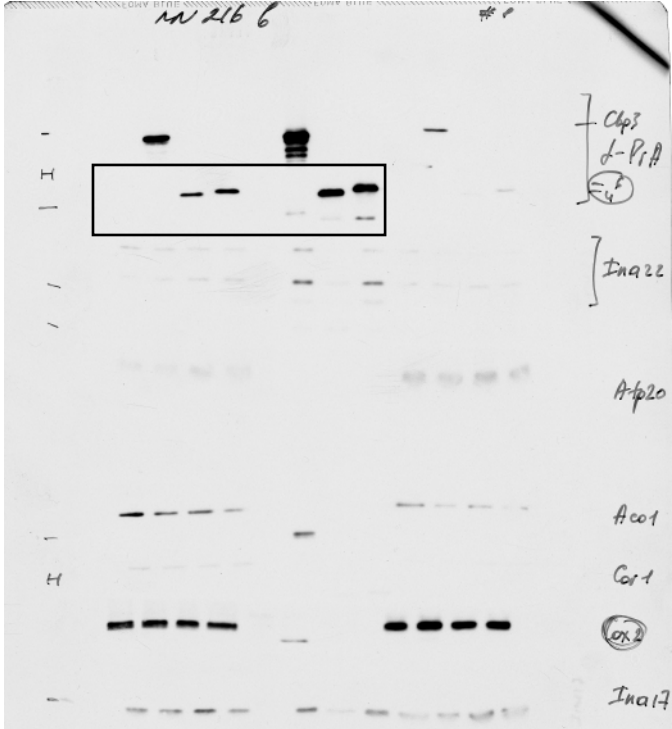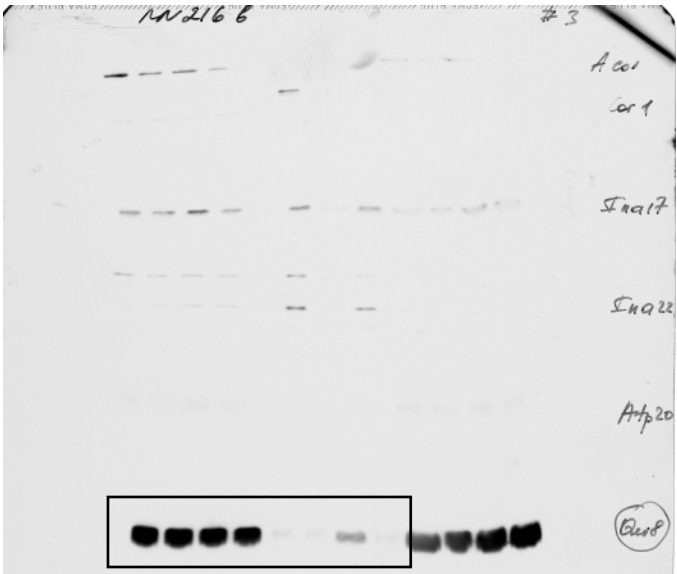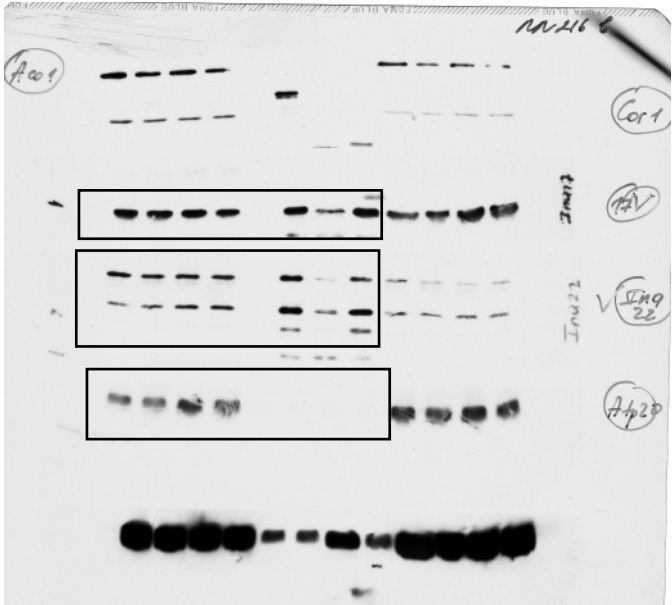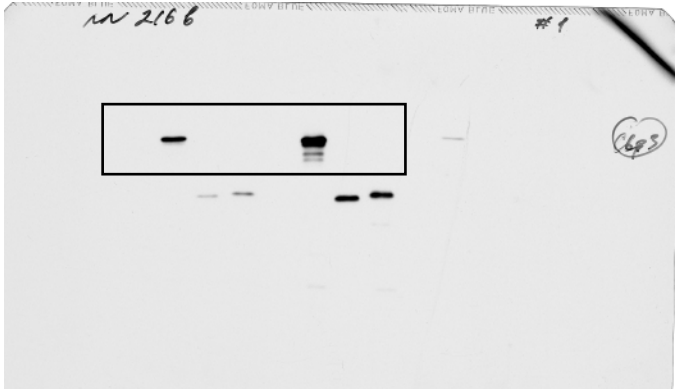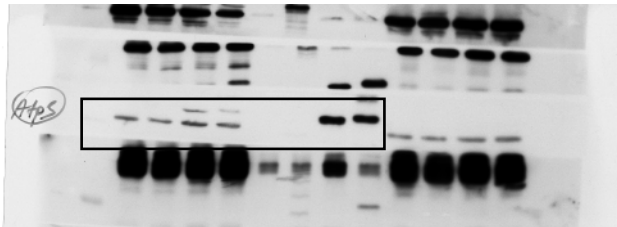

Supplementary Figure 15 .

Original scans of key Western blots and gels presented in the paper

Supplementary Figure 4b

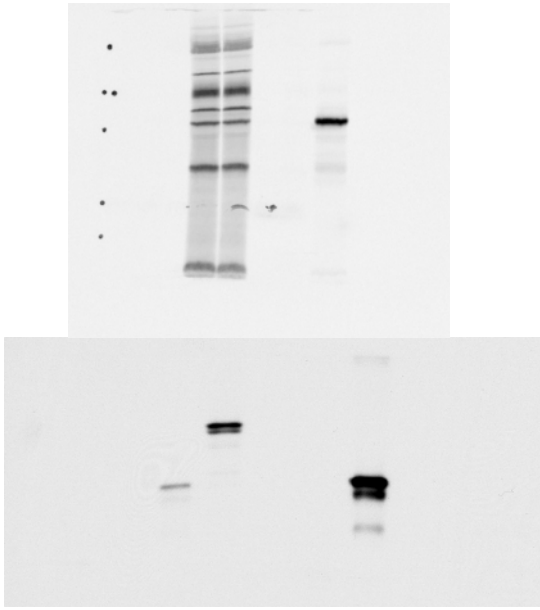

Supplementary Figure 4c

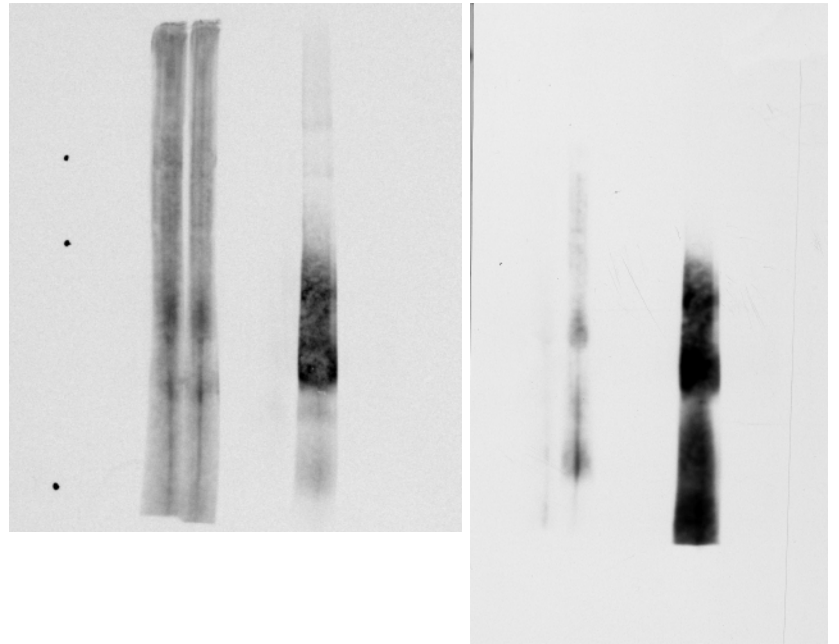

Supplementary Figure 4d

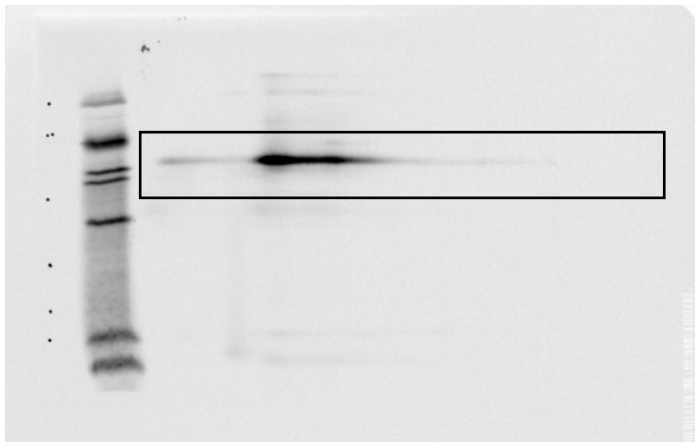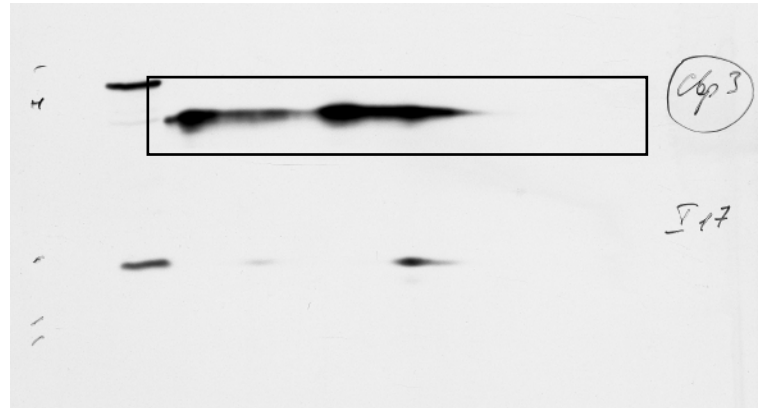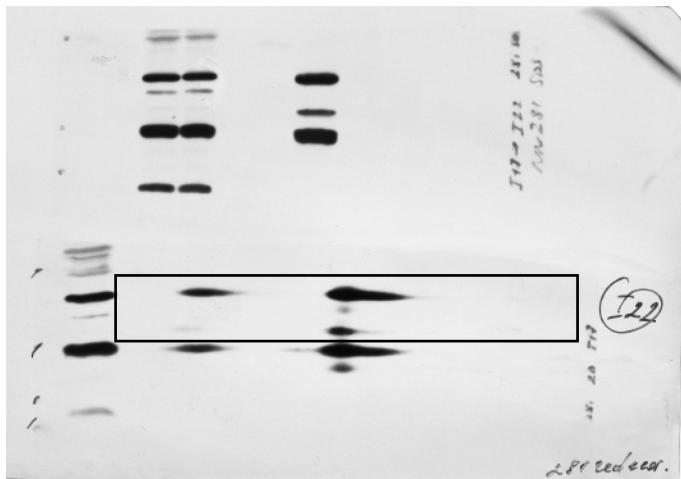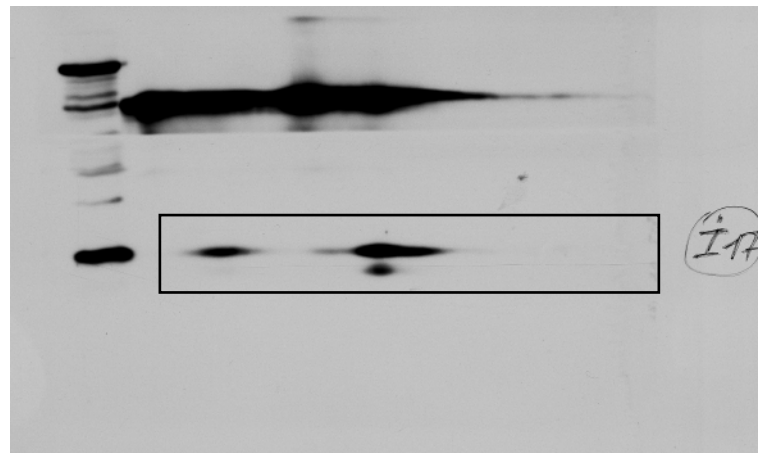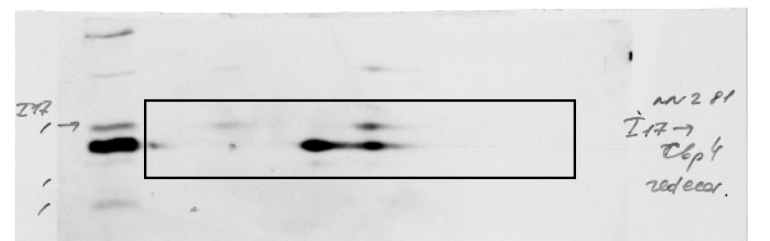



## SUPPLEMENTARY INFORMATION

### Supplementary Table 1

Yeast strains used in this study.

| Strain                                                 | Genotype                                                                                        | Source or author reference |
|--------------------------------------------------------|-------------------------------------------------------------------------------------------------|----------------------------|
| BY4741                                                 | <i>MATa, his3Δ1, leu2Δ, met15Δ0, ura3Δ0</i>                                                     | 32                         |
| <i>ina22Δ</i>                                          | <i>MATa, his3Δ1, leu2Δ, met15Δ0, ura3Δ0, INA22::kanMX4</i>                                      | Euroscarf                  |
| <i>ina17Δ</i>                                          | <i>MATa, his3Δ1, leu2Δ, met15Δ0, ura3Δ0, INA17::kanMX4</i>                                      | Euroscarf                  |
| <i>Ina22</i> <sup>1-188</sup> (NNY42)                  | <i>MATa, his3Δ1, leu2Δ, met15Δ0, ura3Δ0, INA22<sup>189-216</sup>::HIS3MX6</i>                   | This study                 |
| <i>Ina22</i> <sup>1-168</sup> (NNY40)                  | <i>MATa, his3Δ1, leu2Δ, met15Δ0, ura3Δ0, INA22<sup>169-216</sup>::HIS3MX6</i>                   | This study                 |
| <i>Atp23</i> ↑ (NNY106)                                | <i>MATa, his3Δ1, leu2Δ, met15Δ0, ura3Δ0, GPD:Atp23</i>                                          | This study                 |
| <i>ina22Δ Atp23</i> ↑ (NNY108)                         | <i>MATa, his3Δ1, leu2Δ, met15Δ0, ura3Δ0, INA22::kanMX4, GPD:Atp23</i>                           | This study                 |
| <i>Ina22</i> <sup>FLAG</sup> (NNY136)                  | <i>MATa, his3Δ1, leu2Δ, met15Δ0, ura3Δ0, ina22::INA22<sup>FLAG</sup>-URA3</i>                   | This study                 |
| <i>Ina22</i> <sup>HA</sup> (OLY03)                     | <i>MATa, his3Δ1, leu2Δ, met15Δ0, ura3Δ0, ina22::INA22<sup>HA</sup>-HIS3MX6</i>                  | 24                         |
| <i>Atp23</i> <sup>HA</sup> (NNY52)                     | <i>MATa, his3Δ1, leu2Δ, met15Δ0, ura3Δ0, atp23::ATP23<sup>HA</sup>-HIS3MX6</i>                  | This study                 |
| <i>Atp10</i> <sup>ProtA</sup> (NNY112)                 | <i>MATa, his3Δ1, leu2Δ, met15Δ0, ura3Δ0, atp10::ATP10-TEV-ProtA-7His-HIS3MX6</i>                | This study                 |
| <i>Atp10</i> <sup>ProtA</sup> : <i>ina22Δ</i> (NNY113) | <i>MATa, his3Δ1, leu2Δ, met15Δ0, ura3Δ0, INA22::kanMX4, atp10::ATP10-TEV-ProtA-7His-HIS3MX6</i> | This study                 |
| <i>Cbp3</i> <sup>ProtA</sup> (NNY23)                   | <i>MATa, his3Δ1, leu2Δ, met15Δ0, ura3Δ0, cbp3::CBP3-TEV-ProtA-7His-HIS3MX6</i>                  | This study                 |
| <i>Cbp4</i> <sup>ProtA</sup> (NNY24)                   | <i>MATa, his3Δ1, leu2Δ, met15Δ0, ura3Δ0, cbp4::CBP4-TEV-ProtA-7His-HIS3MX6</i>                  | This study                 |
| <i>Cbp6</i> <sup>ProtA</sup> (NNY25)                   | <i>MATa, his3Δ1, leu2Δ, met15Δ0, ura3Δ0, cbp6::CBP6-TEV-ProtA-7His-HIS3MX6</i>                  | This study                 |
| <i>cbp3Δ</i> (NNY26)                                   | <i>MATa, his3Δ1, leu2Δ, met15Δ0, ura3Δ0, CBP3::HIS3MX6</i>                                      | This study                 |
| <i>cbp4Δ</i> (NNY27)                                   | <i>MATa, his3Δ1, leu2Δ, met15Δ0, ura3Δ0, CBP4::HIS3MX6</i>                                      | This study                 |
| <i>cbp6Δ</i> (NNY28)                                   | <i>MATa, his3Δ1, leu2Δ, met15Δ0, ura3Δ0, CBP6::HIS3MX6</i>                                      | This study                 |

## Supplementary Table 2

Oligonucleotides used in this study

| Oligo    | Sequence                                                                        | Purpose                                                                                |
|----------|---------------------------------------------------------------------------------|----------------------------------------------------------------------------------------|
| NN034    | GGATTTAGGTGACACTATAGAATACATGGTTG<br>CATCAGCAAATGCGGG                            | Forward primer for synthesis of radiolabeled truncated Ina22 (devoid of a presequence) |
| NN035    | GAGCCTACTACATCATCATTAGAAATTTTGGG                                                | Synthesis of radiolabeled Ina22 <sup>27-216</sup> protein                              |
| NN036    | CTACTACATCATCATGGCGATTTCAATCAAATC<br>ACC                                        | Synthesis of radiolabeled Ina22 <sup>27-206</sup> protein                              |
| NN037    | CTACTACATCATCATCATCATATGGACAT                                                   | Synthesis of radiolabeled Ina22 <sup>27-196</sup> protein                              |
| NN038    | CTACTACATCATCATAACCTTTTCATCTTCTTT<br>TTTC                                       | Synthesis of radiolabeled Ina22 <sup>27-186</sup> protein                              |
| NN039    | CTACTACATCATCATTAAATCTTTTAGAACATT<br>C                                          | Synthesis of radiolabeled Ina22 <sup>27-176</sup> protein                              |
| NN040    | CTACTACATCATCATAATCCCTTCTTTGTTCTT<br>AACGC                                      | Synthesis of radiolabeled Ina22 <sup>27-166</sup> protein                              |
| NN041    | CTACTACATCATCATTGGAGTTTTTTTCGATTAC<br>TTC                                       | Synthesis of radiolabeled Ina22 <sup>27-156</sup> protein                              |
| NN042    | CTACTACATCATCATCTCGTCTATTATACTTTG<br>CC                                         | Synthesis of radiolabeled Ina22 <sup>27-146</sup> protein                              |
| NN043    | CTACTACATCATCAATGACTCTTCCTTAGG<br>AACC                                          | Synthesis of radiolabeled Ina22 <sup>27-136</sup> protein                              |
| S1_Ina22 | CAACAAGGAAAGACAAGTCATACGTAAGGT<br>GTAAGGAAAAATGCGTACGCTGCAGGTCGAC               | Forward primer for <i>INA22</i> deletion                                               |
| S2_Ina22 | GCGTTATATTTACATGTGGTATATCCGGATGC<br>ATAGAGCCTACTAATCGATGAATTCGAGCTCG            | Reverse primer for <i>INA22</i> deletion/HA-tagging                                    |
| S3_Ina22 | TTGAATGAAATCGCCAAAGAATGATAAAAT<br>CCCAAATTTCTACGCTACGCTGCAGGTCGAC               | C-terminal HA-tagging of Ina22                                                         |
| NN079    | GAAAAAATCCAGATGCTGGCGTTAAGAACAA<br>AGAAGGGATTGCACTTAGCGTACGCTGCAG<br>GTCGAC     | Generation of Ina22 <sup>1-188</sup> strain                                            |
| NN081    | GTTCTAAAAGATTTAGAAAAGTCGAAAAAGA<br>AGATGAAAAGGTTTACCTATAGCGTACGCTGC<br>AGGTCGAC | Generation of Ina22 <sup>1-188</sup> strain                                            |
| NN181    | GCTTGC GTTATATTTACATGTGGTATAT-<br>CCGGATGCATAGAGCCTAATCGATGAATTCGA<br>GCTCG     | C-terminal FLAG-tagging of Ina22                                                       |
| NN182    | GATAAAATCCCAAATTTCTAGACTACAAAGA<br>CGATGACGACAAGTAGCGTACGCTGCAGGTC<br>GAC       | C-terminal FLAG-tagging of Ina22                                                       |
| NN090    | GGAAAGCTGATAGTACCGAATTTTTTTTTTTT<br>TGGCACGATATGCGTACGCTGCAGGTCGAC              | Generation of <i>ATP23</i> overexpression strain                                       |
| NN093    | GCATGGTCCGTCTCCACCACTCAAACCCAGC<br>ATTATCCCCACTGCTATTCATCGATGAATTCTC<br>TGTCG   | Generation of <i>ATP23</i> overexpression strain                                       |
| NN091    | GCGTCTATATATTTTCTATTATAGAATATTGTC<br>ATTTATTACATTGGTTCAATCGATGAATTCGAG<br>CTCG  | C-terminal tagging of Atp23                                                            |
| NN092    | GGGACAGTTGCTTCGCCGATACGAGACCGTT<br>TGATGAGATTTACAGACGTACGCTGCAGGTC<br>GAC       | C-terminal tagging of Atp23                                                            |
| NN150    | GCCAAATAGCCGCCATCCCTTGTGGCCGC<br>CGCACAAAGCGTCAACTTCAATCGATGAATTC               | C-terminal ProtA-tagging of Atp10                                                      |

|       |                                                                             |                                               |
|-------|-----------------------------------------------------------------------------|-----------------------------------------------|
|       | GAGCTCG                                                                     |                                               |
| NN151 | GGCTACTCCATCTGAAAAGGAAGCATTGTGGA<br>AGTTTGCCAAACGTCTGCGTACGCTGCAGGT<br>CGAC | C-terminal ProtA-tagging<br>of Atp10          |
| NN185 | GGATTTAGGTGACACTATAGAATACATGCAGG<br>GCACTTTTAAAAGGTTTTACCATCCC              | Synthesis of radiolabeled<br>Atp10            |
| NN186 | TTACATCATCATCAGACGTTTGGCAAACCTCC<br>ACAATGCTTCCTTTTC                        | Synthesis of radiolabeled<br>Atp10            |
| NN222 | GATCTCCGTAACAATCTCTTCAGCTATTCCAA<br>CACTTGATGCGTACGCTGCAGGTGCGAC            | Deletion of <i>CBP3</i> gene                  |
| NN223 | CTAAACGAGCTAGTTTGTAACCTTCAAACTTAT<br>GAAAACACATCGATGAATTCGAGCTCG            | Deletion/C-terminal<br>tagging of <i>CBP3</i> |
| NN224 | CCTAAAACCTTACCAAGCGAGAGAAGTAGGCT<br>GTCATATACAAACCGTACGCTGCAGGTGCGAC        | C-terminal tagging of<br>Cbp3                 |
| NN225 | GCTCATCCCCCGGGTATTTTATCAAGATAAA<br>ATTTTATATACATGCGTACGCTGCAGGTGCGAC        | Deletion of <i>CBP4</i> gene                  |
| NN226 | GCAAAAGTTCAAGCTGCCCTTCCTAATTGAGT<br>GACCCGACCCATCTAATCGATGAATTCGAGCT<br>CG  | Deletion/C-terminal<br>tagging of <i>CBP4</i> |
| NN227 | GGAAATAGTCCAGGATAAGCAGGTAAAAGCT<br>GGTGGCGCTTCTGGCGTACGCTGCAGGTGCGA<br>C    | C-terminal tagging of<br>Cbp4                 |
| NN228 | CAGCTTACCAAGTTAAACTCCGTATTCCACAA<br>GCAAGTGCCAAAATGCGTACGCTGCAGGTGCG<br>AC  | Deletion of <i>CBP6</i> gene                  |
| NN229 | GAATAAATATGTATTTACAAGCTTAGAAAATAA<br>TGTGCTCTTTA ATCGATGAATTCGAGCTCG        | Deletion/C-terminal<br>tagging of <i>CBP6</i> |
| NN230 | GAAAAAGGAAAGCTTATTTACTGCAATGAGAA<br>CTGTATTATTTGGTAAACGTACGCTGCAGGTG<br>GAC | C-terminal tagging of<br>Cbp6                 |
