# Supplementary material for: INA complex liaises the F1Fo-ATP synthase membrane motor modules
Source: PubMed Central journal article supplement (PMC5665977; doi:10.1038/s41467-017-01437-z), 2017-11-01
Supplement: 41467_2017_1437_MOESM2_ESM.pdf [file 41467_2017_1437_MOESM2_ESM.pdf]

## Description of Supplementary Files

File name: Supplementary Data 1

Description: Mass spectrometric analyses of proteins purified together with Atp10, using Atp10<sup>ProtA</sup> containing mitochondria from wild type and *ina22Δ* cells

File name: Supplementary Data 2

Description: Mass spectrometric analyses of proteins purified together with Atp23 upon immunoisolation of Atp23 from wild type and *ina22Δ* cells

File name: Supplementary Data 3

Description: Mass spectrometric analyses of protein complexes separated by BN-PAGE after immunoisolation of Ina22<sup>FLAG</sup> from wild type mitochondria
